# Supplementary material for: ROR1 is Expressed in Diffuse Large B-Cell Lymphoma (DLBCL) and a Small Molecule Inhibitor of ROR1 (KAN0441571C) Induced Apoptosis of Lymphoma Cells
Source: PubMed Central journal article supplement (PMC7344684; doi:10.3390/biomedicines8060170), 2020-06-23
Supplement: biomedicines-08-00170-s001.pdf [file biomedicines-08-00170-s001.pdf]

## Supplementary Materials

**Table S1.** Physicochemical differences comparing KAN 0439834 and KAN0441571.

| Physicochemical characteristics                   | KAN0439834 | KAN0441571 |
|---------------------------------------------------|------------|------------|
| Molecular weight                                  | 535        | 555        |
| cLogD <sub>7.4</sub> (calculated)                 | 2.8        | 1.7        |
| Polar surface area (Å <sup>2</sup> ) (calculated) | 104        | 73         |

**Table S2.** Factors on overall survival.

| Cox Proportional Hazard Models       |          |               |                 |           |                 |                 |                |
|--------------------------------------|----------|---------------|-----------------|-----------|-----------------|-----------------|----------------|
| <b>Unadjusted</b>                    |          |               |                 |           |                 |                 |                |
| <b>Variable</b>                      | <b>n</b> | <b>events</b> | <b>censored</b> | <b>HR</b> | <b>CI-lower</b> | <b>CI-upper</b> | <b>p-value</b> |
| ROR1 < 10%                           | 33       | 25            | 8               | 0.43      | 0.19            | 0.96            | <b>0.039</b>   |
| <b>Adjusted for age</b>              |          |               |                 |           |                 |                 |                |
| <b>Variable</b>                      | <b>n</b> | <b>events</b> | <b>censored</b> | <b>HR</b> | <b>CI-lower</b> | <b>CI-upper</b> | <b>p-value</b> |
| Age ≤ 60                             | 33       | 25            | 8               | 0.55      | 0.24            | 0.30            | 0.120          |
|                                      |          |               |                 | 0.50      | 0.16            | 1.51            | 0.218          |
| <b>Adjusted for gender</b>           |          |               |                 |           |                 |                 |                |
| <b>Variable</b>                      | <b>n</b> | <b>events</b> | <b>censored</b> | <b>HR</b> | <b>CI-lower</b> | <b>CI-upper</b> | <b>p-value</b> |
| ROR1 < 10%                           | 33       | 25            | 8               | 0.43      | 0.19            | 0.98            | <b>0.046</b>   |
| Gender: female                       |          |               |                 | 0.93      | 0.41            | 2.11            | 0.866          |
| <b>Adjusted for clinical subtype</b> |          |               |                 |           |                 |                 |                |
| <b>Variable</b>                      | <b>n</b> | <b>events</b> | <b>censored</b> | <b>HR</b> | <b>CI-lower</b> | <b>CI-upper</b> | <b>p-value</b> |
| ROR1 < 10%                           | 33       | 25            | 8               | 0.34      | 0.14            | 0.82            | <b>0.016</b>   |
| Recurrent                            |          |               |                 | 1.77      | 0.72            | 4.37            | 0.215          |
| <b>Adjusted for Ann Arbor stage</b>  |          |               |                 |           |                 |                 |                |
| <b>Variable</b>                      | <b>n</b> | <b>events</b> | <b>censored</b> | <b>HR</b> | <b>CI-lower</b> | <b>CI-upper</b> | <b>p-value</b> |
| ROR1 < 10%                           | 33       | 25            | 8               | 0.43      | 0.19            | 0.96            | <b>0.041</b>   |
| Stage III or IV                      |          |               |                 | 0.84      | 0.36            | 1.96            | 0.685          |
| <b>Adjusted for IPI</b>              |          |               |                 |           |                 |                 |                |
| <b>Variable</b>                      | <b>n</b> | <b>events</b> | <b>censored</b> | <b>HR</b> | <b>CI-lower</b> | <b>CI-upper</b> | <b>p-value</b> |
| ROR1 < 10%                           | 33       | 25            | 8               | 0.52      | 0.23            | 1.20            | 0.127          |
| IPI 1-2                              |          |               |                 | 0.37      | 0.16            | 0.85            | <b>0.019</b>   |
| <b>Adjusted for COO</b>              |          |               |                 |           |                 |                 |                |
| <b>Variable</b>                      | <b>n</b> | <b>events</b> | <b>censored</b> | <b>HR</b> | <b>CI-lower</b> | <b>CI-upper</b> | <b>p-value</b> |
| ROR1 < 10%                           | 28       | 21            | 7               | 0.54      | 0.22            | 1.32            | 0.18           |
| COO (GC)                             |          |               |                 | 0.93      | 0.38            | 2.23            | 0.88           |

**Table S3.** The ROR1 inhibitors KAN0439834 and KAN0441571C bind to a set of targets. The potencies (radiometric assay (ProQinase)) are lower than the binding affinities (displacement assay (DiscoverX)) on targets.

| Target        | Mechanism                 | Affinity/Potency                           |
|---------------|---------------------------|--------------------------------------------|
| ROR1          | Apoptosis<br>EMT          | < 25 nMIC50 (ROR1 dephosphorylation)       |
| CDK 4/6/7/9   | Cell cycle<br>Translation | Low nM binding/<br>low-high nM potency     |
| Aurora A      | Mitosis<br>EMT            | Low-mid nM binding/<br>mid-high nM potency |
| FLT3          | Leukemic blasts           | Low nM Kd binding/<br>mid-high nM potency  |
| JAK1,2,3/TYK2 | Immune response           | Low nM binding/<br>mid-high nM potency     |

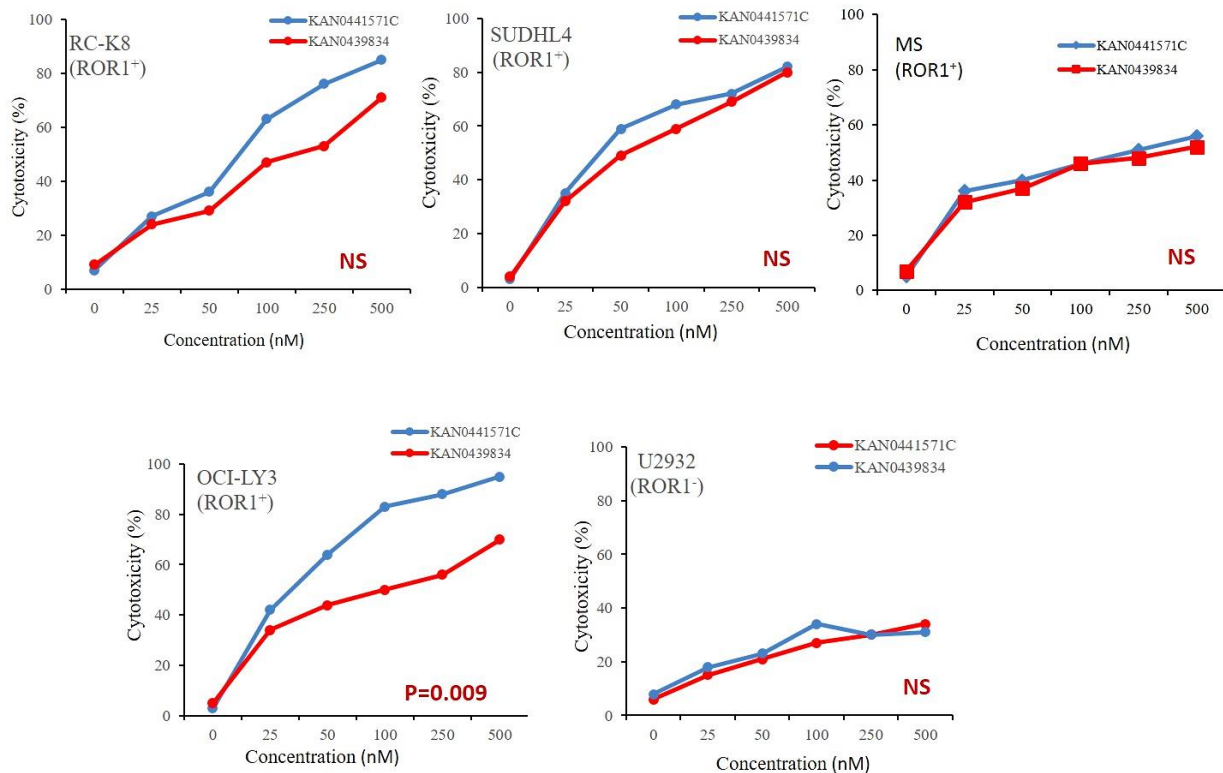

**Figure S1.** Comparison of cytotoxicity of KAN0441571C and KAN0439834 on DLBCL cell lines. For each concentration 6 replicates were used and each experiment was done twice.

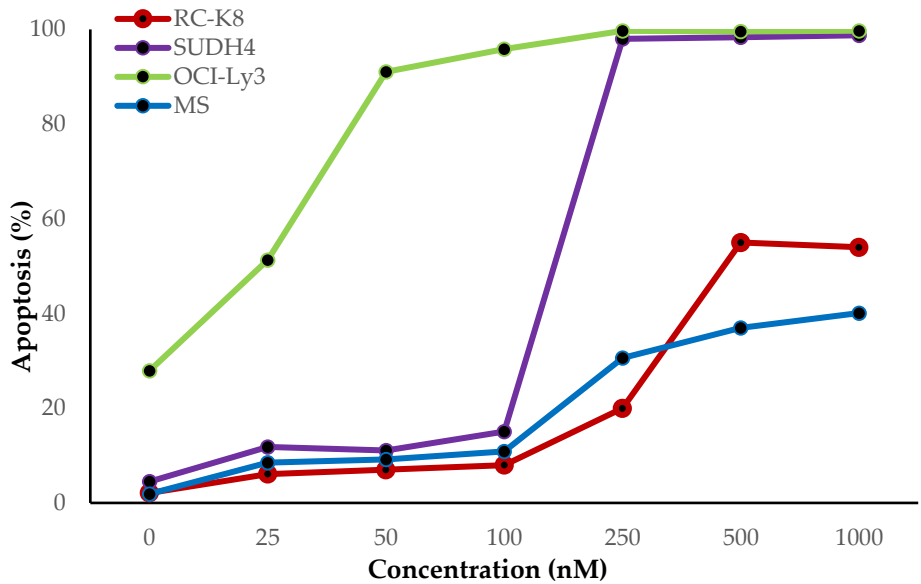

**Figure S2.** Apoptosis (Annexin-V/PI) of DLBCL cell lines after 24 h of incubation with KAN0441571C.

**A**

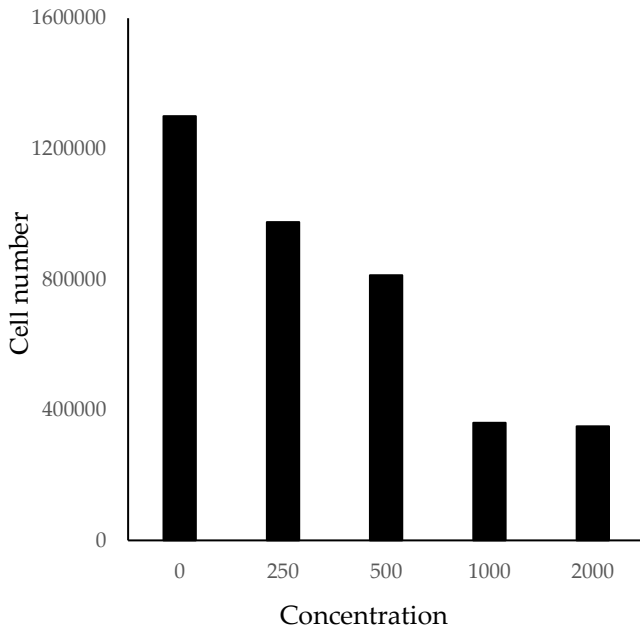

**B**

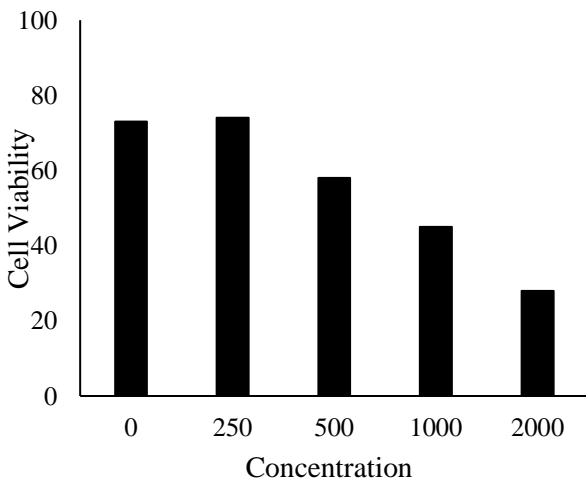

3

**C**

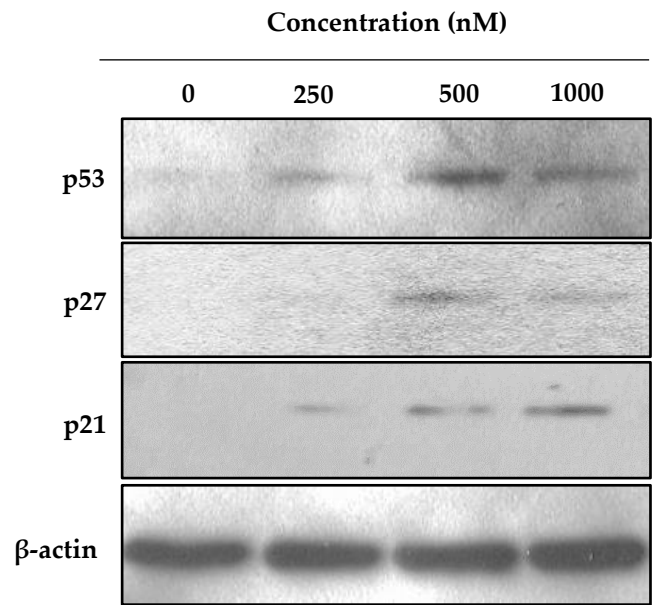

**D**

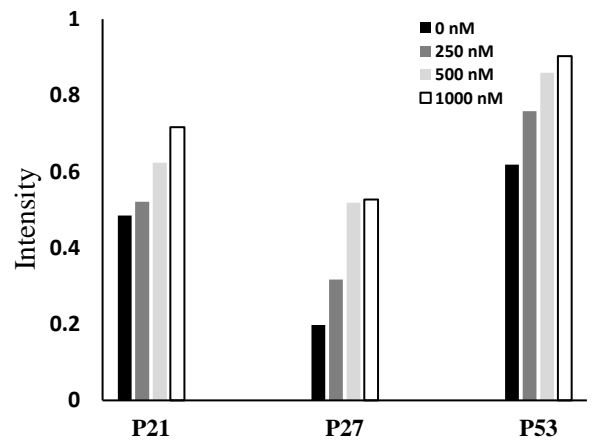

**Figure S3.** Treatment of the DLBCL cell line OCI-LY3 with KAN0441571C (48 h) induced a dose-dependent growth inhibition and cell death (A, B) (cell counting and viability, trypan blue exclusion assay). Western blot analysis showed a dose-dependent increase in the levels of the cell cycle inhibitors p21 and p27 associated with an increase in the level of p53 (C, D).

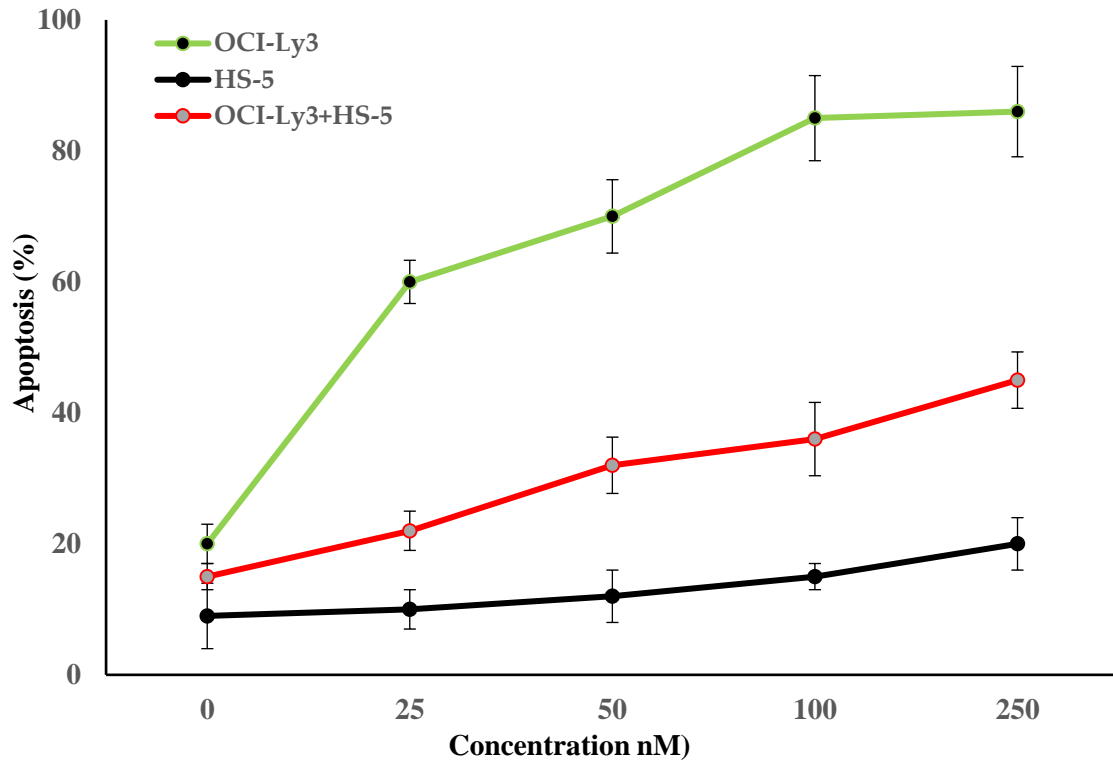

**Figure S4.** Apoptosis (Annexin V/PI) (24 h) in the DLBCL cell line, (OCI-Ly3) (ROR1<sup>+</sup>) co-cultured with HS-5 stromal cells (ROR1<sup>-</sup>) and KAN0441571C. OCI-Ly3 alone (10<sup>5</sup> cells/well) (green line); 10<sup>5</sup> OCI-Ly3 cells + 10<sup>5</sup> HS-5 cells/well (red line); 10<sup>5</sup> HS-5 cells/well (black line). Apoptosis of DLBCL cells were identified by gating for CD19. For each concentration experiment was done three times.

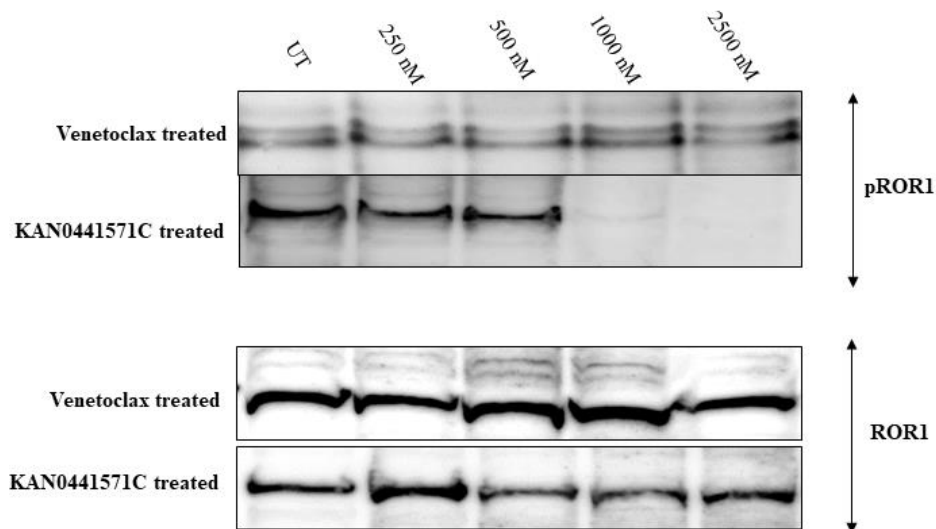

**Figure S5.** Effects on phosphorylation of ROR1 (pROR1) by venetoclax and KAN0441571C in OCI-LY3 cell line, incubated for 4 hours. Data are representative of three individual experiments.

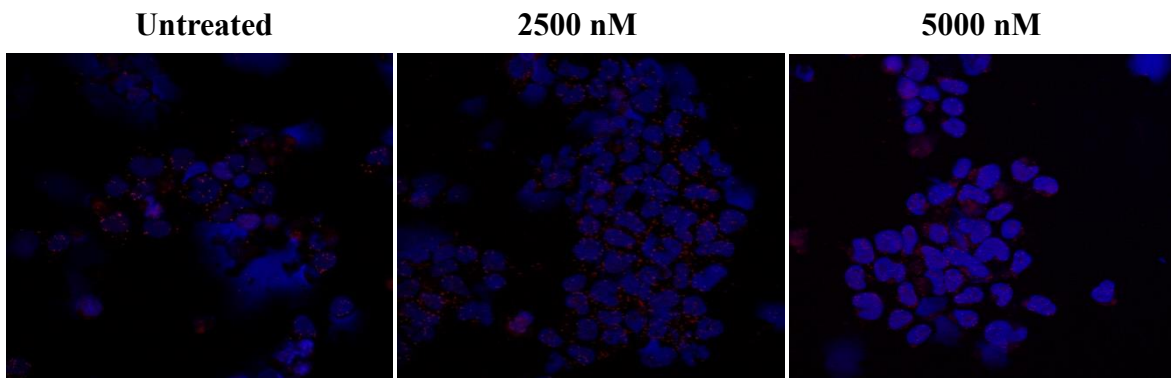

**Figure S6.** ROR1/LRP6 dimerization in OCI-Ly3 cell line. Representative staining images of untreated OCI-Ly3 cell line using anti-ROR1 and LRP6 antibodies in the in situ proximity ligation assay (PLA) (40 $\times$ ) and staining of OCI-Ly3 cells treated with KAN0441571C (2500 and 5000 nM, 6 h). Blue fluorescence (DAPI) was used for counterstaining. Pictures were captured by a fluorescent microscope (40 $\times$ ) (Scale bar: 20  $\mu$ m).
